# Supplementary material for: Metastatic pattern with mild prognostic impact in high-volume castration-sensitive prostate cancer
Source: Research Square preprint supplement (doi:10.21203/rs.3.rs-6006181/v1), 2025-02-14

Figure S1. Flow chart of propensity score matching by tumor volume, extent of disease, and lung metastasis

**197 patients with HV (Bone alone)**

**197 patients with HV (Bone alone)**

**115 patients with LV**

**(EOD1)**

**67 patients**

**(Bone and Lung)**

+

・EOD1 and Lung

(n = 19)

・EOD2 and Lung

(n = 12)

・ EOD3 and Lung

(n = 19)

・EOD4 and Lung

(n = 17)

・EOD1

(n = 22)

・EOD2

(n = 58)

・EOD3

(n = 56)

・EOD4

(n = 61)

・EOD1

(n = 22)

・EOD2

(n = 58)

・EOD3

(n = 56)

・EOD4

(n = 61)

**Propensity score matching 1:1**

**Propensity score matching 1:1**

(Age, PSA, GS, T-stage N-stage, M1a, initial treatment and radiation therapy)

LV

LV

HV

HV

EOD1

(n = 40)

EOD1

(n = 68)

EOD2 + 11 patients with EOD2 and Lung

(n = 68)

EOD1 + 18 patients with EOD1 and Lung

(n = 40)

EOD1

(n = 22)

EOD1

(n = 57)

EOD1

(n = 53)

EOD1

(n = 56)

EOD1

(n = 22)

EOD2

(n = 57)

EOD3

(n = 53)

EOD4

(n = 56)

Fig. S2. Kaplan–Meier analysis of castration resistant-free survival in the entire cohort by tumor volume
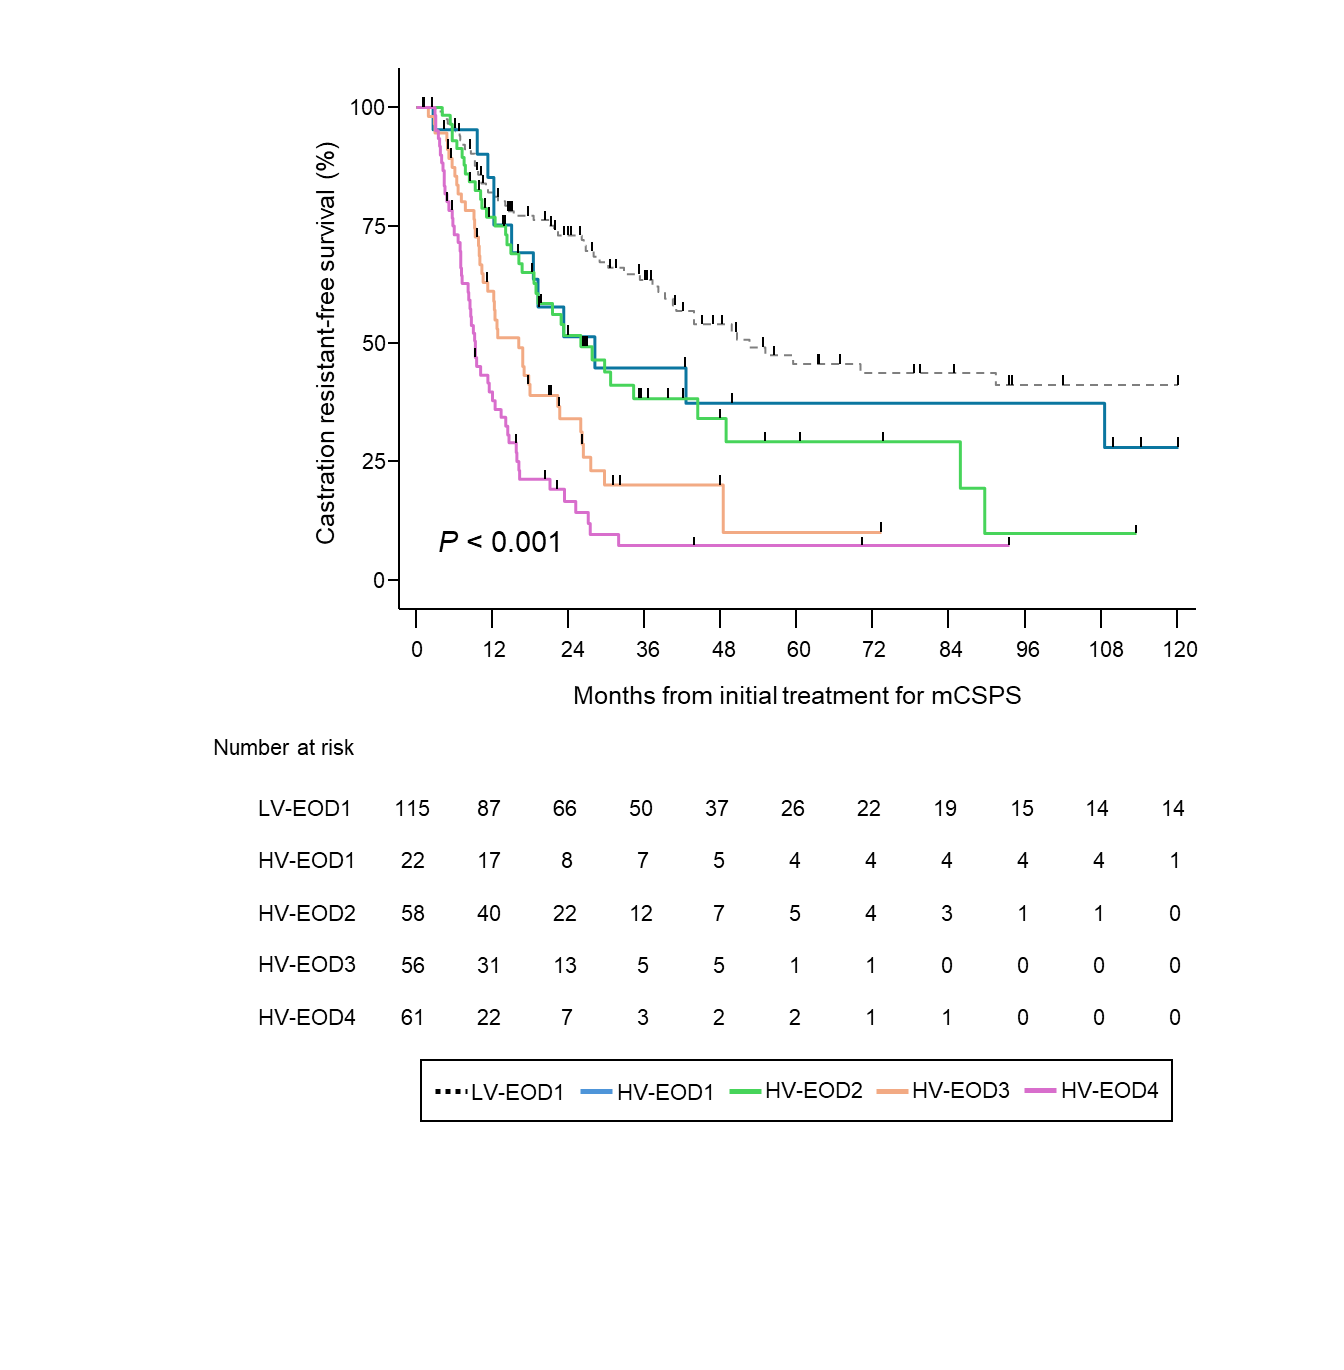
and extent of disease

Fig. S3. Kaplan–Meier analysis of overall survival and castration-resistant-free survival in HV-EOD2 by the number of bone metastases ≤10 or ≥11


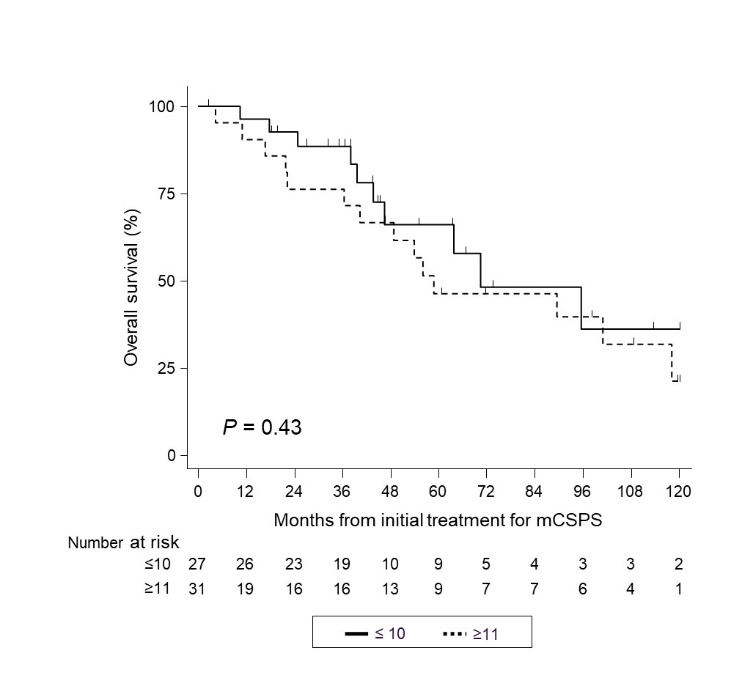
(a)

(b)


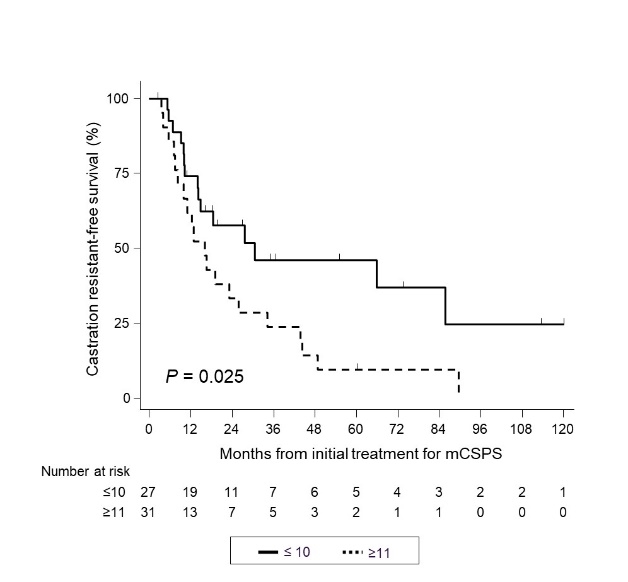


Fig. S4. Kaplan–Meier analysis of castration-resistant-free survival in HV-EOD ≤ 2 and LV-EOD1 after propensity score matching.


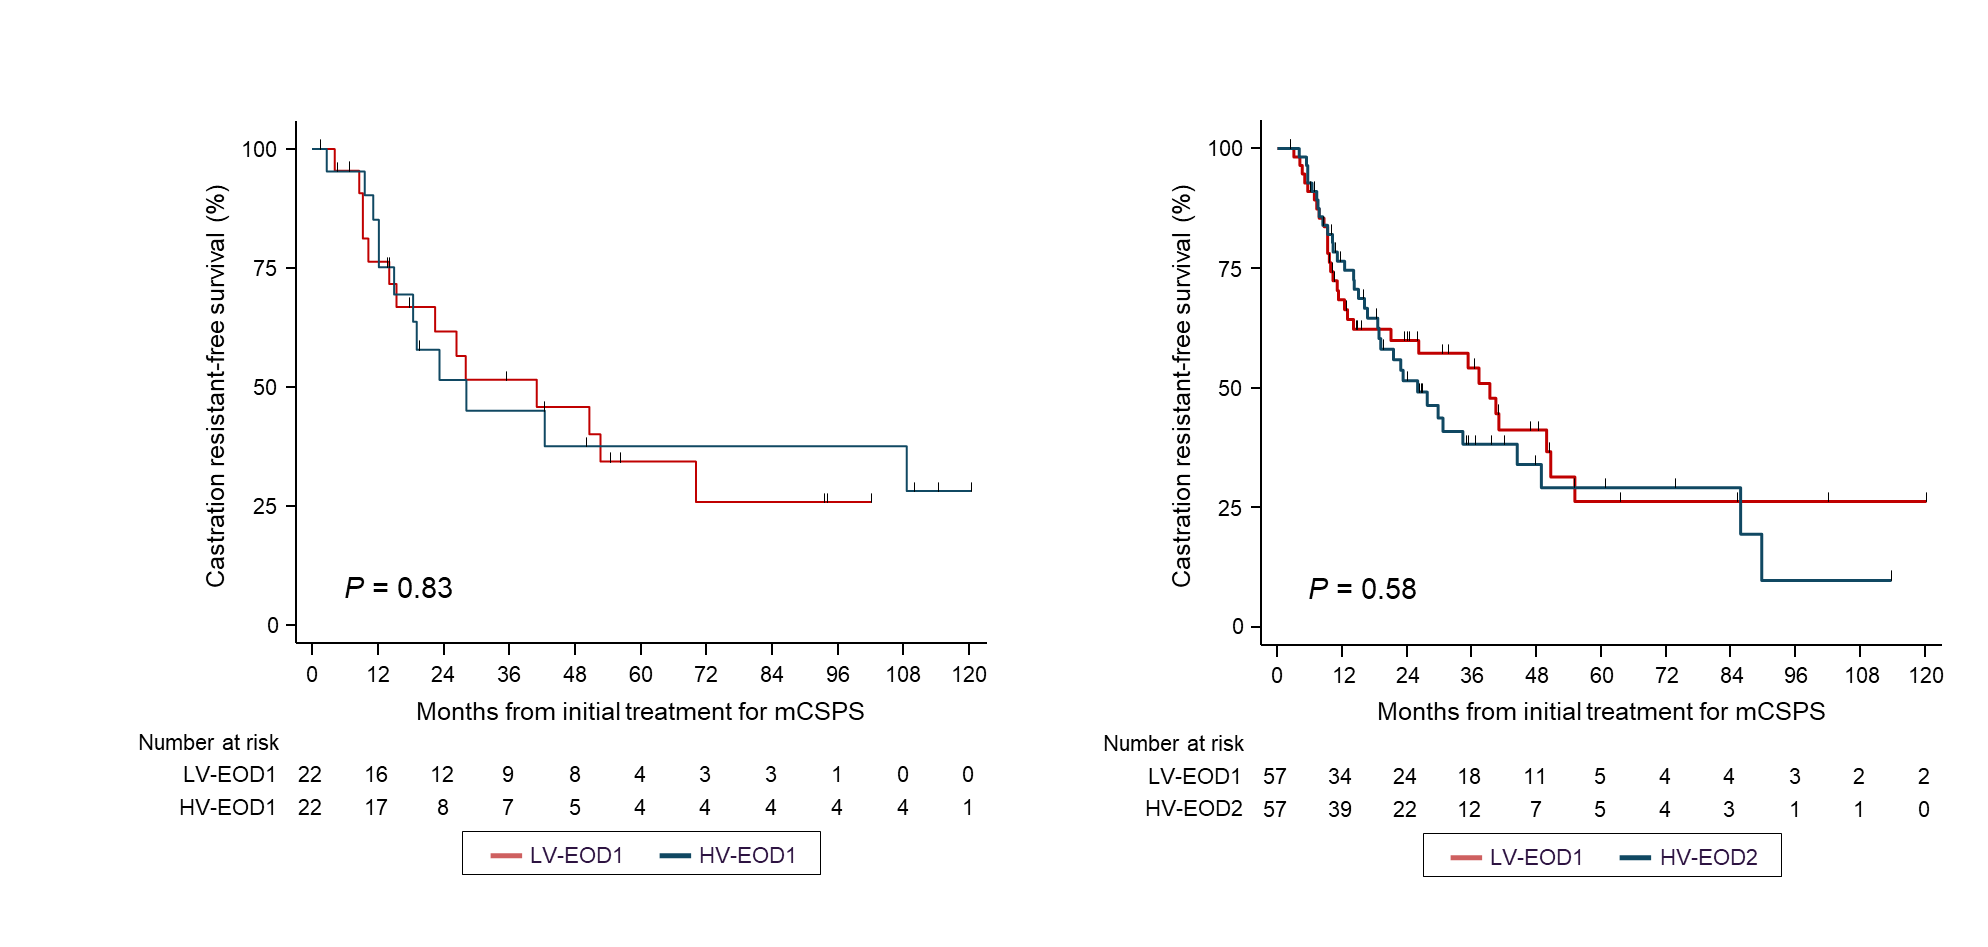
 (a)


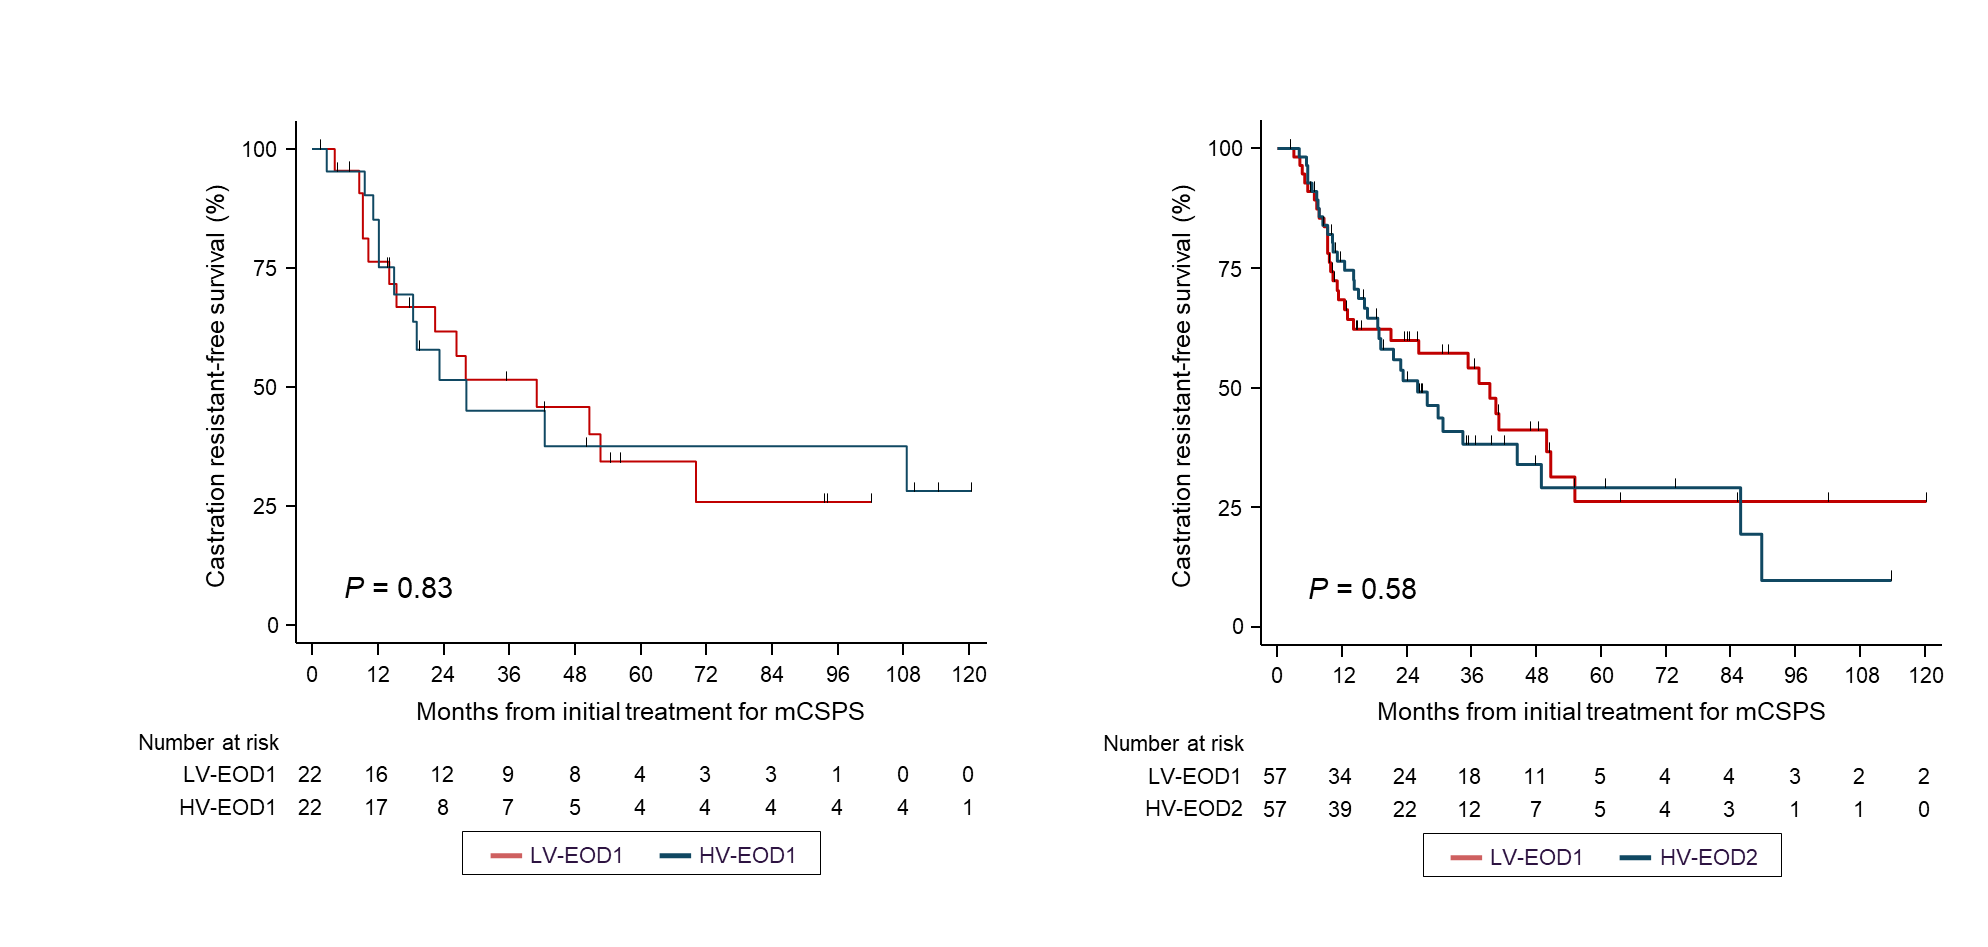
(b)

Fig,S5. Kaplan–Meier analysis of overall survival in HV-EOD ≥ 3 and LV-EOD1 after propensity score matching.


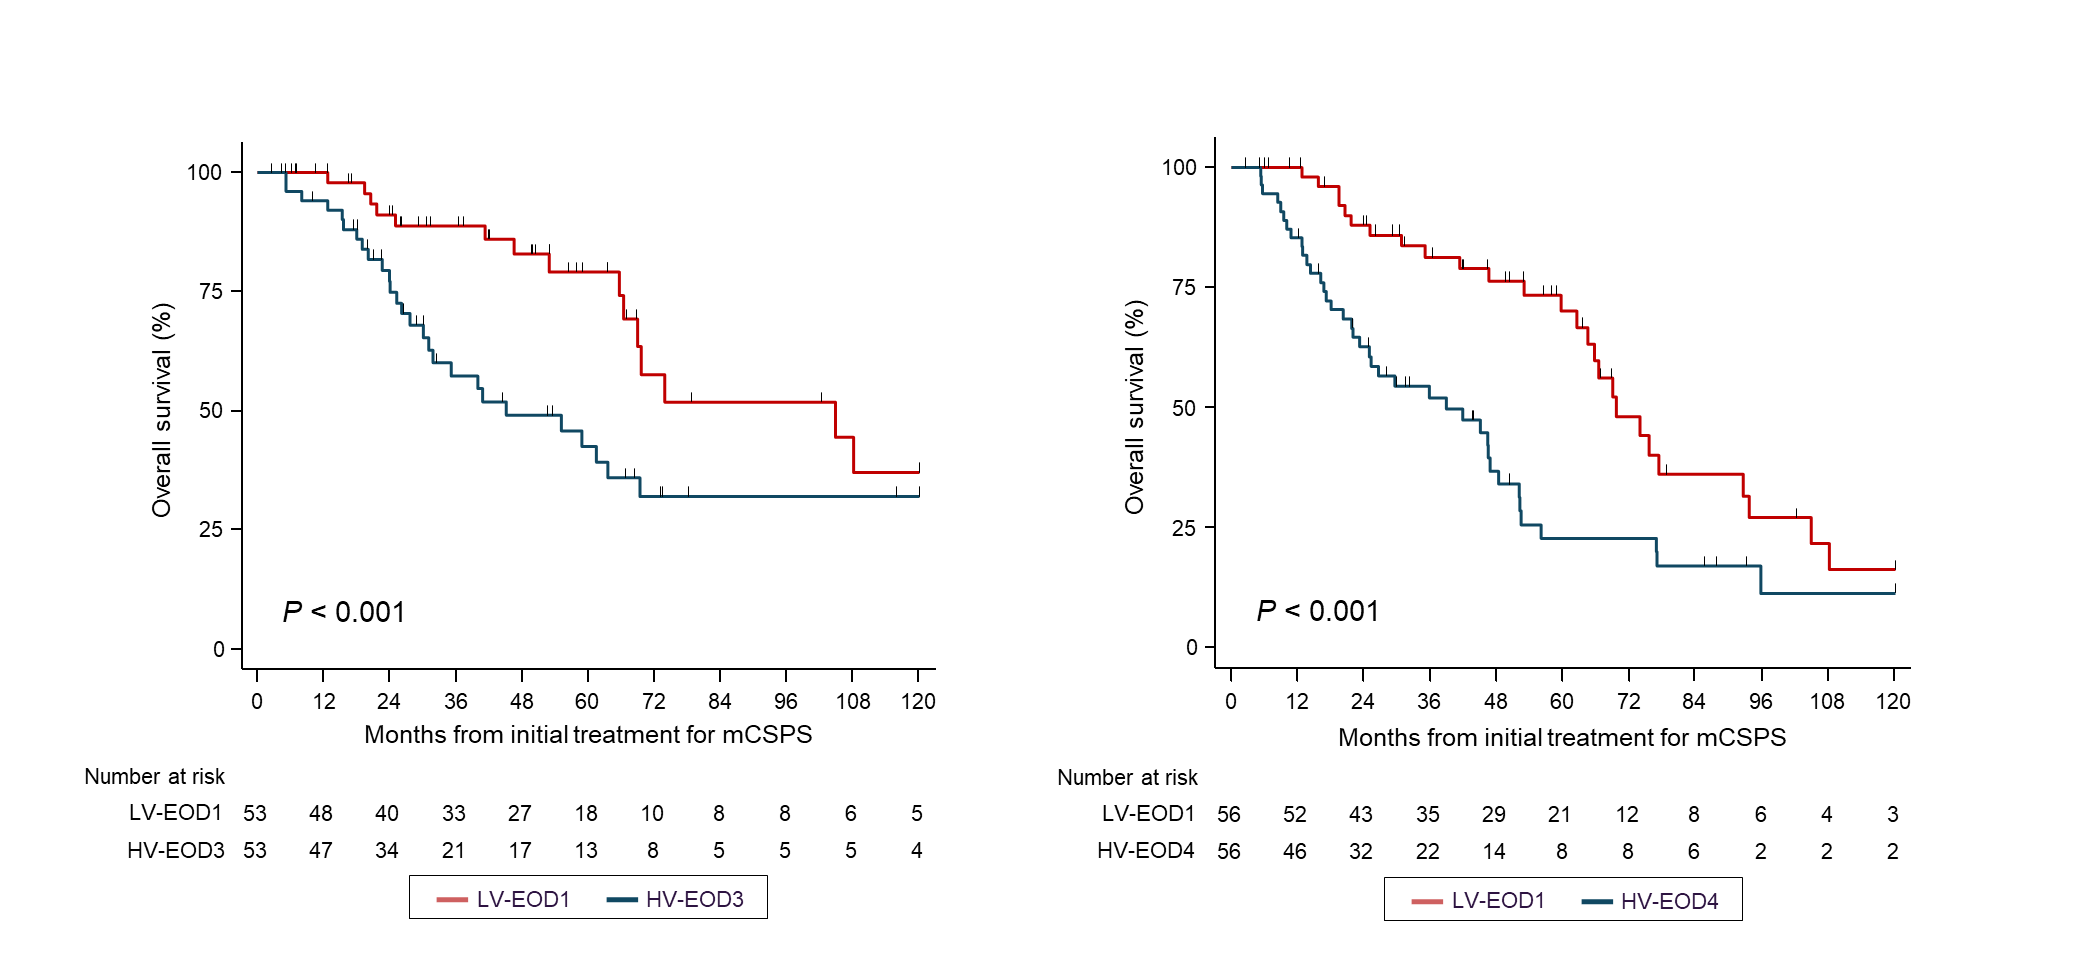
(a)


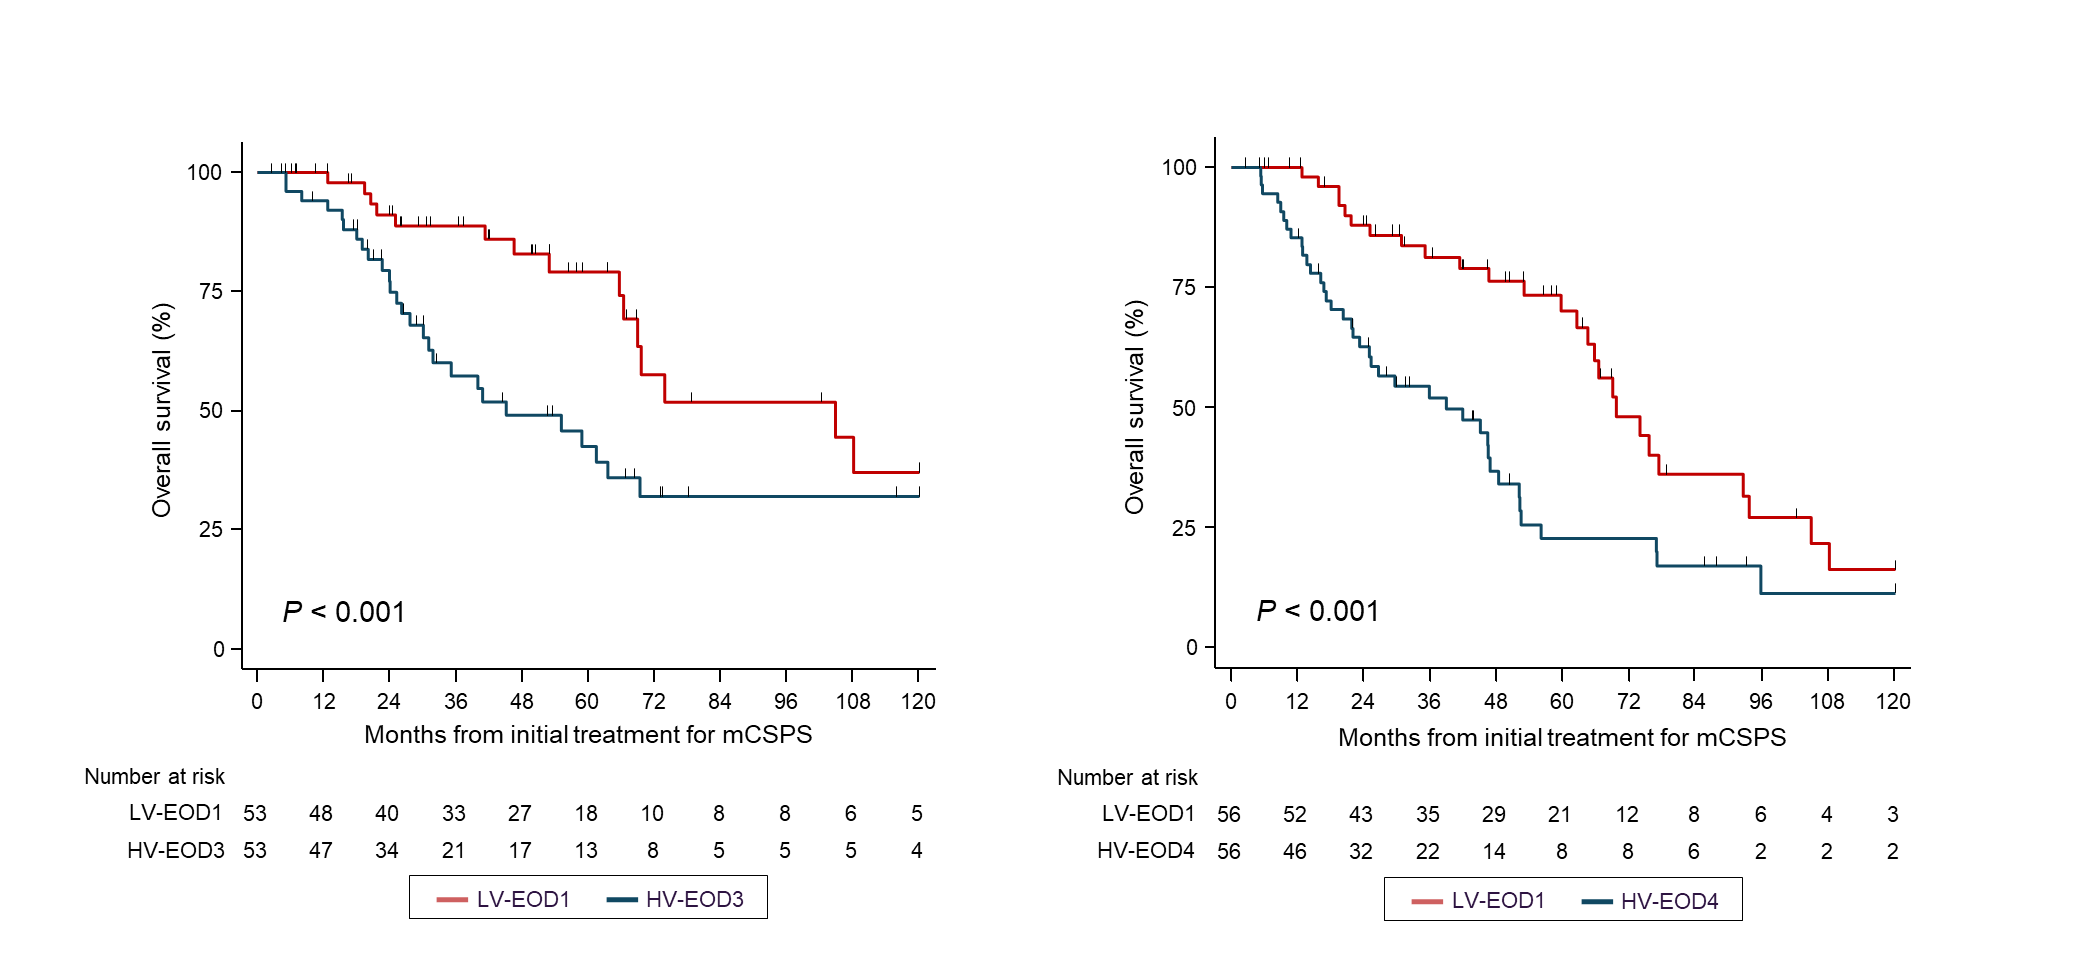
(b)

Fig. S6. Kaplan–Meier analysis of castration resistant-free survival in HV-EOD ≤ 2, including lung metastasis and LV-EOD1 after propensity score matching

(a)


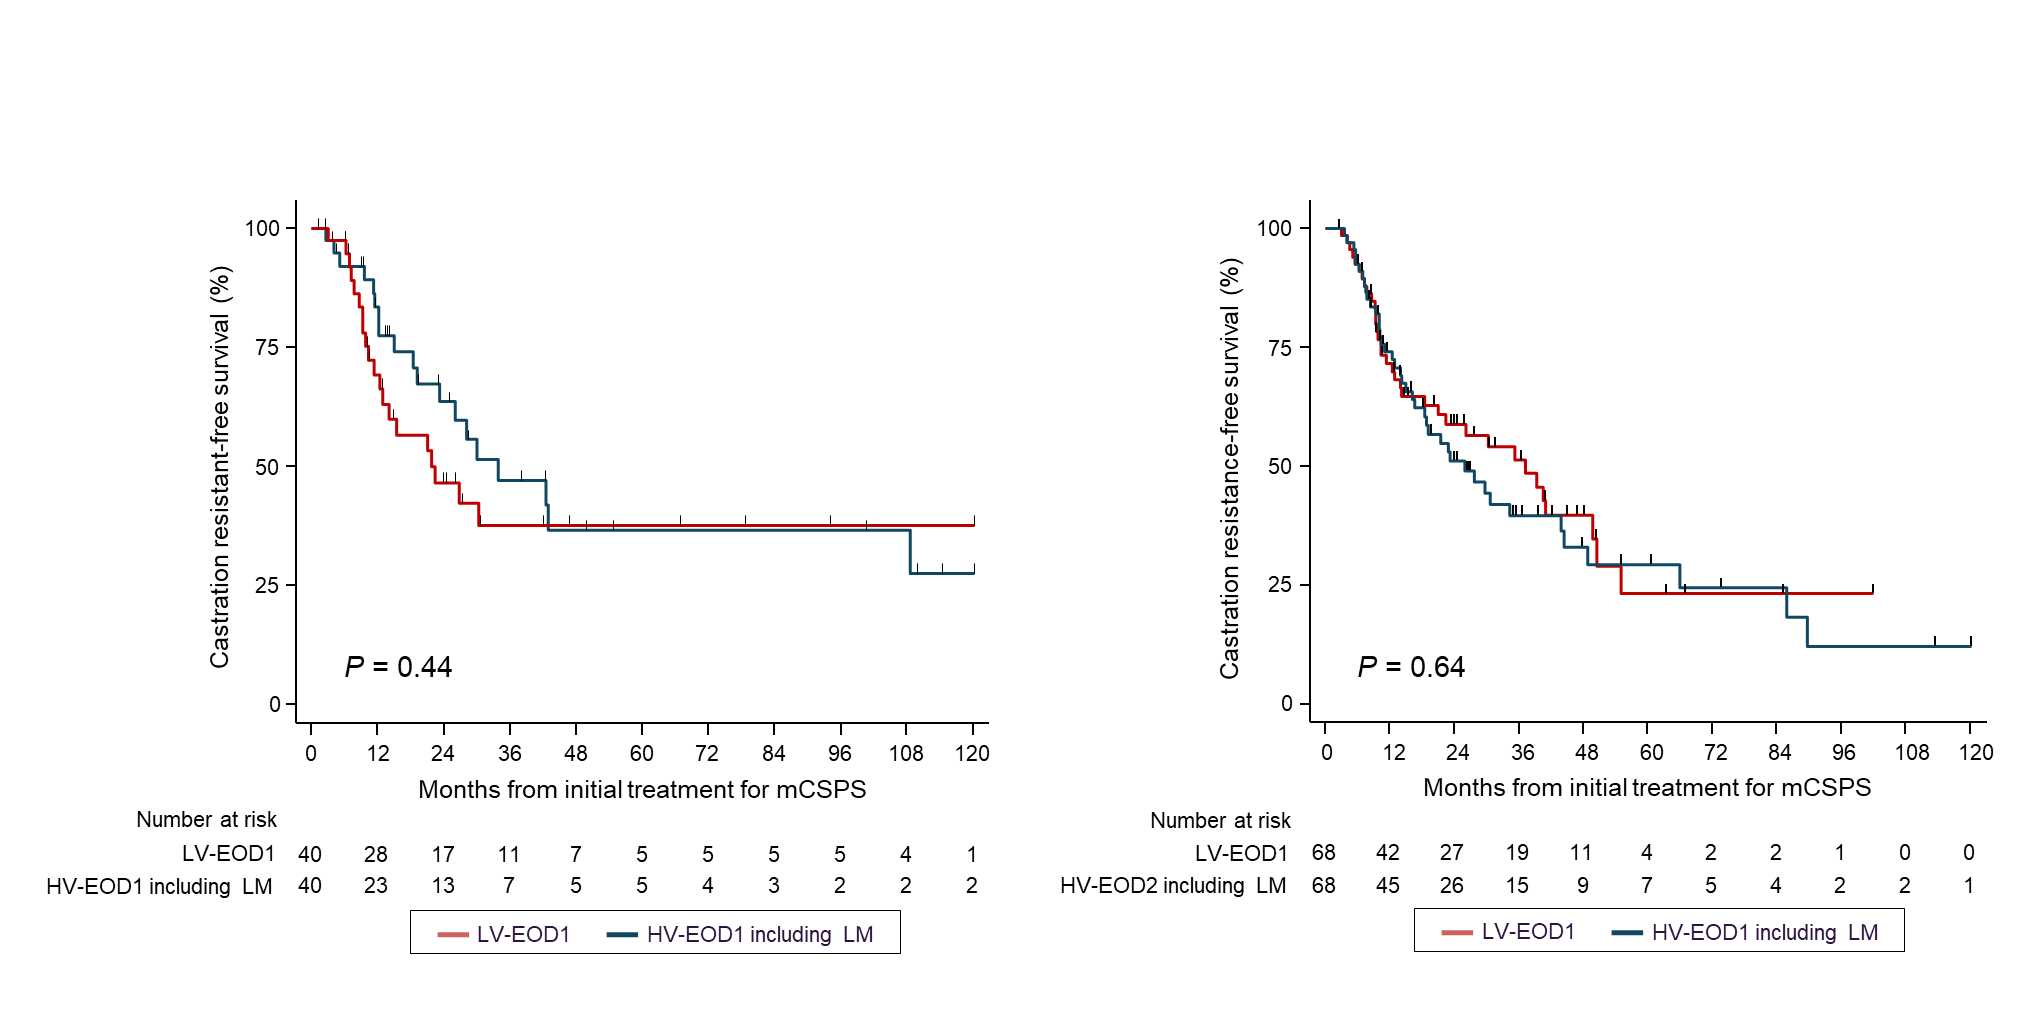


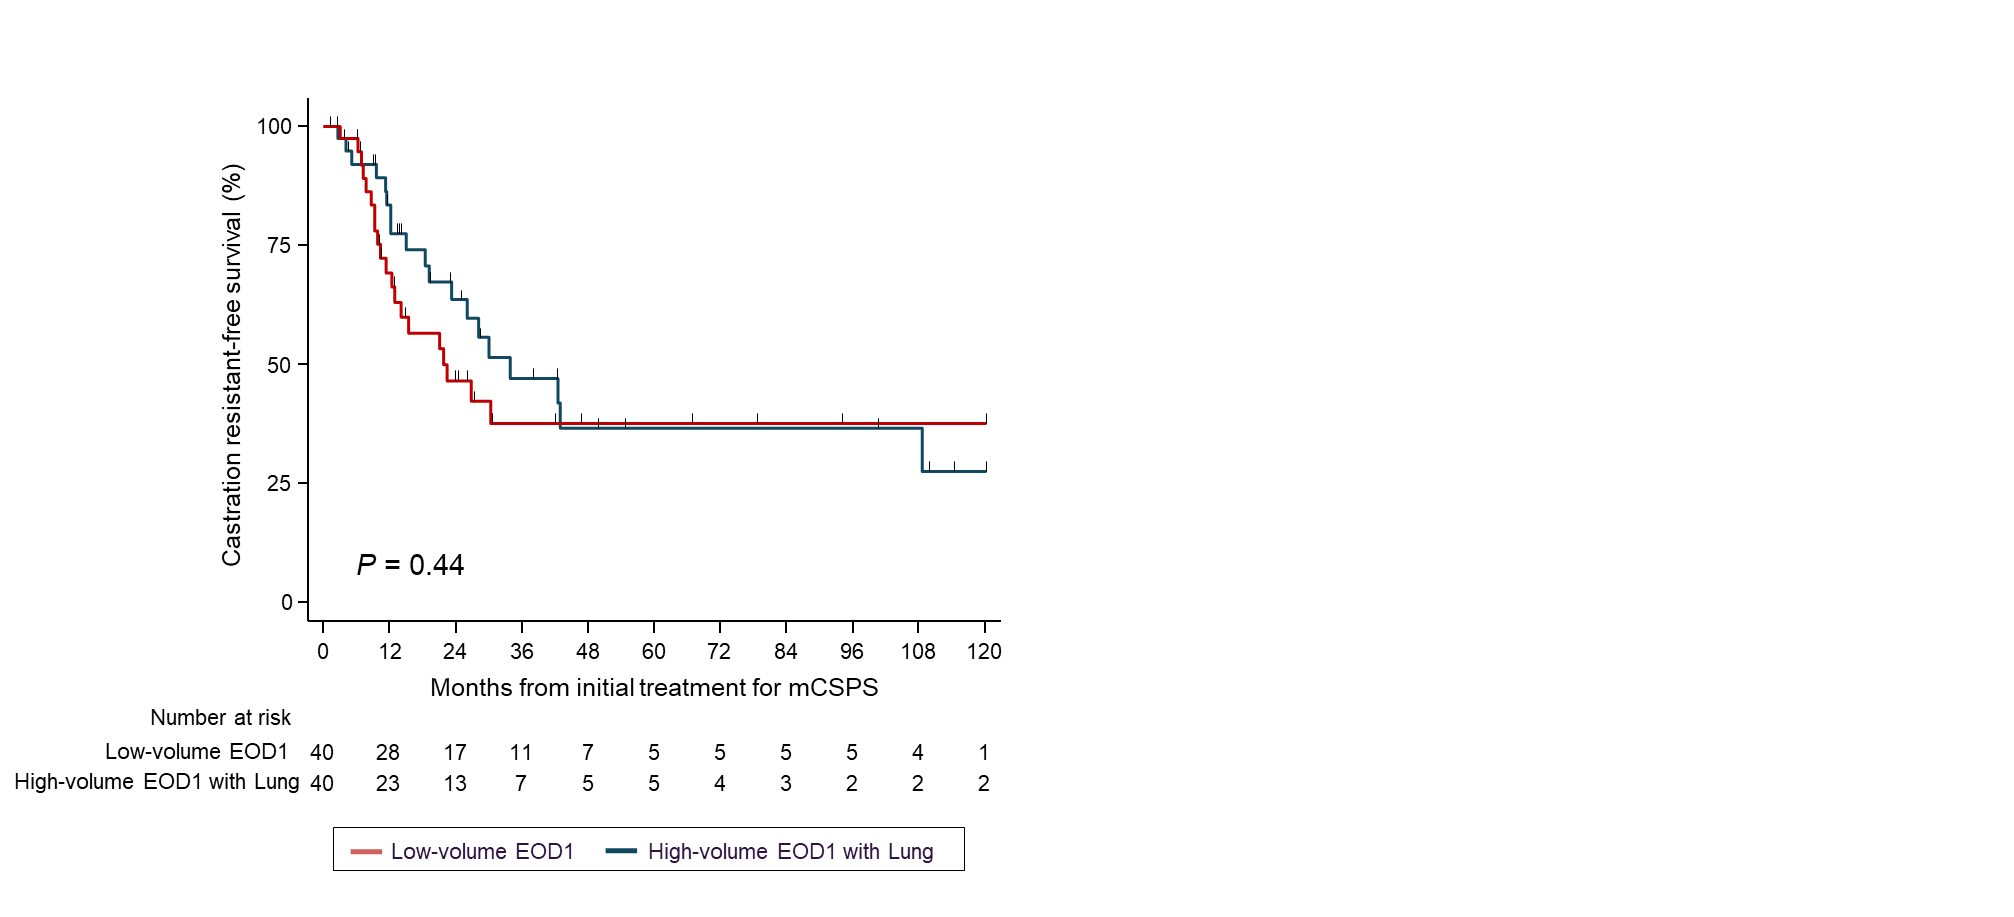


(b)


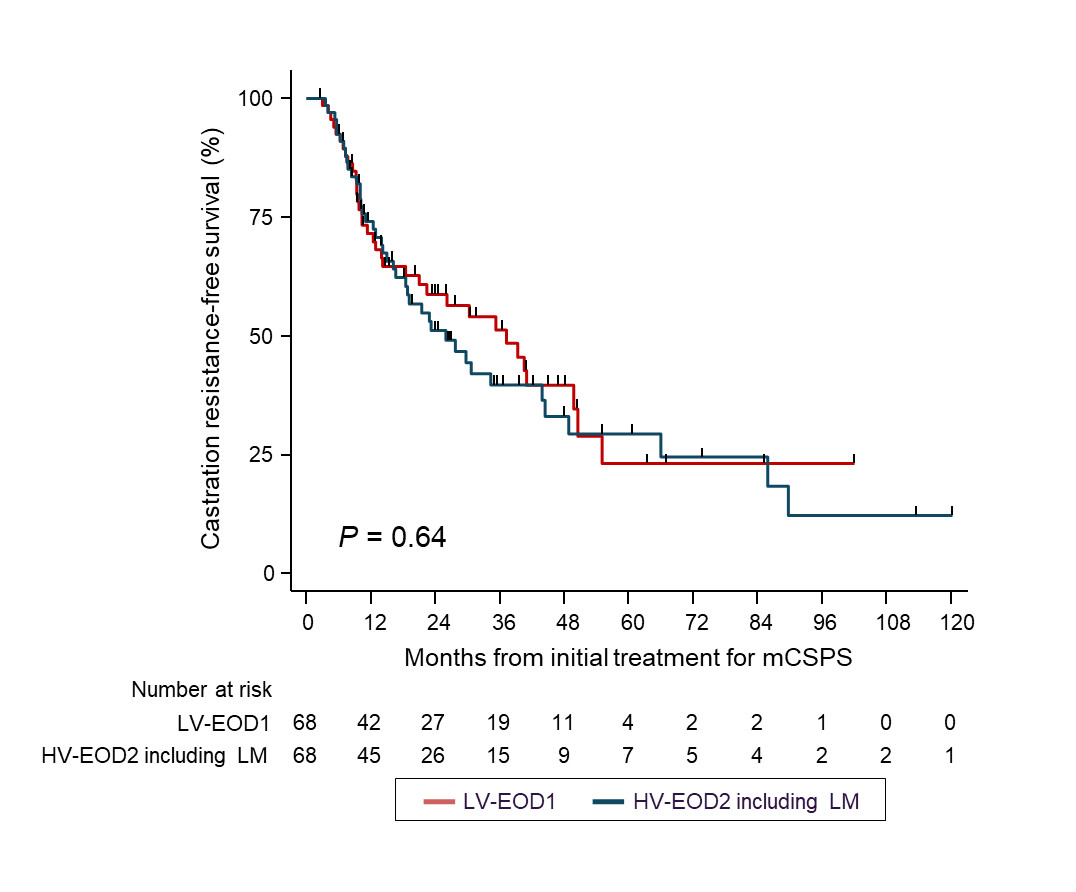

Supplement: Supplementary file 2 [file 4d6d8955b2a5ca89c1211915.docx]
