# Supplementary material for: Metastatic pattern with mild prognostic impact in high-volume castration-sensitive prostate cancer
Source: Research Square preprint supplement (doi:10.21203/rs.3.rs-6006181/v1), 2025-02-14
Supplement: Supplementary file 1 [file 345a4859111c338137511171.docx]

Table S1. Patient background after propensity score matching between HV-EOD ≤ 2, including lung metastasis and LV-EOD1

| **Variables,** n (%) | HV-EOD1 (n = 40) | LV-EDO1  (n = 40) | *P* value | HV-EOD2 (n = 68) | LV-EDO1  (n = 68) | *P* value |
| --- | --- | --- | --- | --- | --- | --- |
| Age ≥ 75, yr | 17 (42.5) | 18 (45.0) | 0.82 | 24 (35.3) | 23 (33.8) | 0.72 |
| Charlson Comorbidity Index ≥ 1 | 16 (40.0) | 13 (32.5) | 0.49 | 21 (30.9) | 20 (29.4) | 0.85 |
| PSA ≥ 100 ng/ml at baseline | 25 (62.6) | 23 (57.5) | 0.65 | 46 (67.6) | 39 (57.4) | 0.22 |
| Gleason score ≥ 9 | 20 (50.0) | 20 (50.0) | - | 34 (50.0) | 35 (51.5) | 0.86 |
| Clinical T ≥ 3b | 26 (65.0) | 27 (67.5) | - | 47 (69.1) | 48 (70.6) | 0.85 |
| Clinical N1 | 18 (45) | 19 (47.5) | 0.82 | 31(45.6) | 33(45.6) | 0.73 |
| Metastatic status |  |  |  |  |  |  |
| Lymph node metastasis | 7 (17.5) | 8 (12.5) | 0.77 | 13 (19.1) | 10 (14.7) | 0.49 |
| Bone metastasis | 40 (100) | 40 (100) | - | 68 (100) | 68 (100) | - |
| Lung metastasis | 18 (45) | 0 | < 0.001 | 11 (16.7) | 0 | < 0.001 |
| Treatment for CSPC |  |  |  |  |  |  |
| ADT or CAB | 33 (82.5) | 32 (80.0) | 0.77 | 51 (75.0) | 52 (76.5) | 0.84 |
| ARPI or DTX | 7 (17.5) | 8 (20.0) | 17 (25.0) | 16 (23.5) |
| Radiation therapy for CSPC | 15 (37.5) | 20 (50.0) | 0.82 | 14 (20.6) | 27 (39.7) | < 0.001 |
| Prostate-directed radiation therapy | 13 (32.5) | 15 (37.5) | 0.64 | 14 (20.6) | 26 (38.2) | 0.024 |
| CRPC, n (%) | 19 (47.5) | 21 (52.5) | 0.82 | 41 (60.3) | 35 (51.5) | 0.39 |
| Death, n (%) | 10 (25.0) | 14 (35.5) | 0.46 | 26 (38.2) | 23 (33.8) | 0.72 |
| Abbreviation: HV, high-volume; LV, low-volume; EOD, extent of disease; PSA, prostate-specific antigen; CSPC, castration-sensitive prostate cancer; ADT, androgen-deprivation therapy; CAB, combined androgen blockade; ARPI, androgen receptor pathway inhibitor; DTX, docetaxel; CRPC, castration-resistant prostate cancer. | | | | | | |

Table S2. First subsequent systemic treatment in propensity score matched cohort

| **Metastatic pattern**, n (%) | **CRPC** | **DTX or ARPI** | **Addition of NA** | **AAT** | **PSL** | **Continuation of the treatment for mCSPC** | **Death** |
| --- | --- | --- | --- | --- | --- | --- | --- |
| LV-EOD1 | 9 | 7 (77.8) | 0 | 0 | 0 | 1 (11.1) | 1 (11.1) |
| HV-EOD1 | 12 | 9 (75.0) | 0 | 1 (8.3) | 0 | 0 | 2 (16.7) |
|  |  |  |  |  |  |  |  |
| LV-EOD1 | 21 | 15 (71.4) | 0 | 3 (14.3) | 0 | 1 (4.8) | 2 (9.5) |
| HV-EOD1 including LM | 19 | 14 (73.7) | 0 | 1 (5.3) | 0 | 2 (10.5) | 2 (10.5) |
|  |  |  |  |  |  |  |  |
| LV-EOD1 | 30 | 21 (70.0) | 1 (3.3) | 4 (13.3) | 1 (3.3) | 2 (6.7) | 1 (3.3) |
| HV-EOD2 | 34 | 25 (73.5) | 1 (2.9) | 5 (14.7) | 1 (2.9) | 2 (5.9) | 0 |
|  |  |  |  |  |  |  |  |
| LV-EOD1 | 35 | 26 (74.3) | 1 (2.9) | 4 (11.4) | 1 (2.9) | 2 (5.7) | 1 (2.9) |
| HV-EOD2 including LM | 41 | 32 (78.0) | 1 (2.4) | 5 (12.2) | 1 (2.4) | 2 (4.9) | 0 |
|  |  |  |  |  |  |  |  |
| LV-EOD1 | 22 | 14 (54.5) | 1 (4.5) | 4 (18.2) | 1 (4.5) | 1 (4.5) | 1 (4.5) |
| HV-EOD3 | 39 | 27 (69.2) | 0 | 6 (15.4) | 0 | 4 (10.3) | 2 (5.1) |
|  |  |  |  |  |  |  |  |
| LV-EOD1 | 31 | 23 (74.2) | 1 (3.2) | 4 (12.9) | 1 (3.2) | 1 (3.2) | 1 (3.2) |
| HV-EOD4 | 47 | 24 (51.1) | 3 (6.4) | 9 (19.1) | 1 (2.1) | 8 (17.0) | 2 (4.3) |
| Abbreviation: CRPC, castration-resistant prostate cancer; DTX, docetaxel; ARPI, androgen receptor pathway inhibitor; NA, nonsteroidal antiandrogen; AAT, alternative antiandrogen therapy; PSL, prednisolone; mCSPC, metastatic castration-sensitive prostate cancer; EOD, extent of disease; LV, low-volume; HV, high-volume; LM, lung metastasis. | | | | | | | |

Table S3. Progression of lung metastasis in patients with bone metastasis plus lung metastasis

| Variables, n (%) | N = 67 |
| --- | --- |
| **Number of lung metastases at baseline** |  |
| 1 | 7 (10.4) |
| 2-10 | 24 (35.8) |
| 11- | 36 (53.7) |
| **Progression by number of lung metastases** |  |
| All | 8 (11.9) |
| 1 | 2 (3.0) |
| 2-10 | 1 (1.5) |
| 11- | 5 (7.5) |
| **Progression pattern at CRPC diagnosis** |  |
| Site-specific radiographic progression |  |
| Lung | 4 (6.0) |
| 1 | 1 (1.5) |
| 2-10 | 1 (1.5) |
| 11- | 2 (3.0) |
| Bone | 20 (29.9) |
| Liver | 5 (7.5) |
| PSA failure without radiographic change | 13 (19.4) |
| **Progression after CRPC diagnosis** |  |
| ALL | 4 (6.0) |
| 1 | 1 (1.5) |
| 2-10 | 0 |
| 11- | 3 (4.5) |
| **Treatment type at the progression of lung metastasis** |  |
| At the diagnosis of CRPC |  |
| CAB | 3 (4.5) |
| ARPI | 1 (1.5) |
| After the diagnosis of CRPC |  |
| ARPI | 3 (4.5) |
| DTX | 1 (1.5) |
| Abbreviation: CRPC, castration-resistant prostate cancer; CAB, combined androgen blockade;  ARPI, androgen receptor pathway inhibitor; DTX, docetaxel. | |

Table S4. A multivariate COX analysis of castration-resistant prostate cancer-free survival in 264 patients with HV disease

| **Variable** | **Reference** | **HR** | **95%CI** | ***P* value** |
| --- | --- | --- | --- | --- |
| EOD ≥ 3 | EOD ≤ 2 | 2.64 | 1.87-3.71 | < 0.001 |
| Age ≥ 75 | Age ≤ 74 | 0.77 | 0.56-1.31 | 0.13 |
| PSA at baseline ≥ 100 g/ml | PSA < 100 ng/ml | 0.88 | 0.59-1.31 | 0.52 |
| Gleason score ≥ 9 | Gleason score ≤ 8 | 1.48 | 1.05-2.10 | 0.026 |
| Clinical T ≥ 3b | Clinical T ≤ 3a | 1.57 | 1.08-2.27 | 0.018 |
| Clinical N stage | Clinical N0 | 1.09 | 0.79-1.52 | 0.59 |
| Clinical M1a | Absence | 1.21 | 0.81-1.80 | 0.36 |
| Lung metastasis | Absence | 1.20 | 0.82-1.75 | 0.35 |
| ARPI or DTX for CSPC | ADT or CAB for CSPC | 0.21 | 0.12-0.36 | < 0.001 |
| Radiation therapy for CSPC | None | 0.42 | 0.19-1.17 | 0.17 |
| Abbreviation: HV, high volume; HR, hazard ratio; CI, confidence interval; EOD, extent of disease; PSA, prostate-specific antigen; CSPC, castration-sensitive prostate cancer; ARPI, androgen receptor pathway inhibitor; DTX, docetaxel; ADT, androgen-deprivation therapy; CAB, combined androgen blockade. | | | | |
